# Supplementary material
Source: MDPI journal article supplement (https://www.mdpi.com/2073-4352/2/3/974)
Supplement: s1 [file s1]

 
data_test 
 
_audit_creation_method            SHELXL-97 
_chemical_name_systematic 
; 
 ? 
; 
_chemical_name_common             ? 
_chemical_melting_point           ? 
_chemical_formula_moiety     'H O12 P3 Zn3, C5 H16 N2, H2 O' 
_chemical_formula_sum        'C5 H19 N2 O13 P3 Zn3' 
_chemical_formula_weight          604.24 
 
loop_ 
 _atom_type_symbol 
 _atom_type_description 
 _atom_type_scat_dispersion_real 
 _atom_type_scat_dispersion_imag 
 _atom_type_scat_source 
 'C'  'C'   0.0033   0.0016 
 'International Tables Vol C Tables 4.2.6.8 and 6.1.1.4' 
 'H'  'H'   0.0000   0.0000 
 'International Tables Vol C Tables 4.2.6.8 and 6.1.1.4' 
 'N'  'N'   0.0061   0.0033 
 'International Tables Vol C Tables 4.2.6.8 and 6.1.1.4' 
 'O'  'O'   0.0106   0.0060 
 'International Tables Vol C Tables 4.2.6.8 and 6.1.1.4' 
 'P'  'P'   0.1023   0.0942 
 'International Tables Vol C Tables 4.2.6.8 and 6.1.1.4' 
 'Zn'  'Zn'   0.2839   1.4301 
 'International Tables Vol C Tables 4.2.6.8 and 6.1.1.4' 
 
_symmetry_cell_setting            monoclinic 
_symmetry_space_group_name_H-M    'P 21/c' 
 
loop_ 
 _symmetry_equiv_pos_as_xyz 
 'x, y, z' 
 '-x, y+1/2, -z+1/2' 
 '-x, -y, -z' 
 'x, -y-1/2, z-1/2' 
 
_cell_length_a                    11.3275(15) 
_cell_length_b                    8.3235(11) 
_cell_length_c                    18.588(2) 
_cell_angle_alpha                 90.00 
_cell_angle_beta                  96.979(3) 
_cell_angle_gamma                 90.00 
_cell_volume                      1739.6(4) 
_cell_formula_units_Z             4 
_cell_measurement_temperature     293(2) 
_cell_measurement_reflns_used     ? 
_cell_measurement_theta_min       ? 
_cell_measurement_theta_max       ? 
 
_exptl_crystal_description        block  
_exptl_crystal_colour             colourless
_exptl_crystal_size_max           0.40 
_exptl_crystal_size_mid           0.30 
_exptl_crystal_size_min           0.24 
_exptl_crystal_density_meas       ? 
_exptl_crystal_density_diffrn     2.307 
_exptl_crystal_density_method     'not measured' 
_exptl_crystal_F_000              1208 
_exptl_absorpt_coefficient_mu     4.447 
_exptl_absorpt_correction_type    multi-scan 
_exptl_absorpt_correction_T_min   0.2693 
_exptl_absorpt_correction_T_max   0.4150 
_exptl_absorpt_process_details    ? 
 
_exptl_special_details 
; 
 ? 
; 
 
_diffrn_ambient_temperature       293(2) 
_diffrn_radiation_wavelength      0.71073 
_diffrn_radiation_type            MoK\a 
_diffrn_radiation_source          'fine-focus sealed tube' 
_diffrn_radiation_monochromator   graphite 
_diffrn_measurement_device_type   ? 
_diffrn_measurement_method        ? 
_diffrn_detector_area_resol_mean  ? 
_diffrn_standards_number          ? 
_diffrn_standards_interval_count  ? 
_diffrn_standards_interval_time   ? 
_diffrn_standards_decay_%         ? 
_diffrn_reflns_number             10734 
_diffrn_reflns_av_R_equivalents   0.0759 
_diffrn_reflns_av_sigmaI/netI     0.1081 
_diffrn_reflns_limit_h_min        -14 
_diffrn_reflns_limit_h_max        15 
_diffrn_reflns_limit_k_min        -11 
_diffrn_reflns_limit_k_max        11 
_diffrn_reflns_limit_l_min        -20 
_diffrn_reflns_limit_l_max        26 
_diffrn_reflns_theta_min          4.34 
_diffrn_reflns_theta_max          30.00 
_reflns_number_total              4954 
_reflns_number_gt                 3105 
_reflns_threshold_expression      >2sigma(I) 
 
_computing_data_collection        ? 
_computing_cell_refinement        ? 
_computing_data_reduction         ? 
_computing_structure_solution     'SHELXS-97 (Sheldrick, 1990)' 
_computing_structure_refinement   'SHELXL-97 (Sheldrick, 1997)' 
_computing_molecular_graphics     ? 
_computing_publication_material   ? 
 
_refine_special_details 
; 
 Refinement of F^2^ against ALL reflections.  The weighted R-factor wR and 
 goodness of fit S are based on F^2^, conventional R-factors R are based 
 on F, with F set to zero for negative F^2^. The threshold expression of 
 F^2^ > 2sigma(F^2^) is used only for calculating R-factors(gt) etc. and is 
 not relevant to the choice of reflections for refinement.  R-factors based 
 on F^2^ are statistically about twice as large as those based on F, and R- 
 factors based on ALL data will be even larger. 
; 
 
_refine_ls_structure_factor_coef  Fsqd  
_refine_ls_matrix_type            full 
_refine_ls_weighting_scheme       calc  
_refine_ls_weighting_details 
 'calc w=1/[\s^2^(Fo^2^)+(0.0445P)^2^] where P=(Fo^2^+2Fc^2^)/3' 
_atom_sites_solution_primary      direct 
_atom_sites_solution_secondary    difmap 
_atom_sites_solution_hydrogens    geom 
_refine_ls_hydrogen_treatment     constr 
_refine_ls_extinction_method      none 
_refine_ls_extinction_coef        ? 
_refine_ls_number_reflns          4954 
_refine_ls_number_parameters      237 
_refine_ls_number_restraints      2 
_refine_ls_R_factor_all           0.1047 
_refine_ls_R_factor_gt            0.0561 
_refine_ls_wR_factor_ref          0.1191 
_refine_ls_wR_factor_gt           0.1059 
_refine_ls_goodness_of_fit_ref    0.956 
_refine_ls_restrained_S_all       0.957 
_refine_ls_shift/su_max           0.084 
_refine_ls_shift/su_mean          0.005 
 
loop_ 
 _atom_site_label 
 _atom_site_type_symbol 
 _atom_site_fract_x 
 _atom_site_fract_y 
 _atom_site_fract_z 
 _atom_site_U_iso_or_equiv 
 _atom_site_adp_type 
 _atom_site_occupancy 
 _atom_site_symmetry_multiplicity 
 _atom_site_calc_flag 
 _atom_site_refinement_flags 
 _atom_site_disorder_assembly 
 _atom_site_disorder_group 
Zn1 Zn 0.62539(6) 0.63858(8) 0.20278(3) 0.01721(15) Uani 1 1 d . . . 
Zn2 Zn 0.35336(6) 0.64775(8) 0.26402(3) 0.01799(16) Uani 1 1 d . . . 
Zn3 Zn 0.63247(6) 0.54416(8) 0.42558(3) 0.01627(15) Uani 1 1 d . . . 
P1 P 0.56122(13) 0.85801(16) 0.32752(7) 0.0148(3) Uani 1 1 d . . . 
P2 P 0.63862(13) 0.57243(16) 0.59737(7) 0.0147(3) Uani 1 1 d . . . 
P3 P 0.19476(13) 0.92592(17) 0.18731(8) 0.0170(3) Uani 1 1 d . . . 
O1 O 0.6104(4) 0.7633(5) 0.3940(2) 0.0222(9) Uani 1 1 d . . . 
O2 O 0.6569(3) 0.9618(5) 0.3004(2) 0.0215(8) Uani 1 1 d . . . 
O3 O 0.4568(3) 0.9596(5) 0.3466(2) 0.0217(8) Uani 1 1 d . . . 
O4 O 0.5128(3) 0.7412(4) 0.2644(2) 0.0195(8) Uani 1 1 d . . . 
O5 O 0.6959(3) 0.7107(5) 0.6435(2) 0.0218(9) Uani 1 1 d . . . 
O6 O 0.6969(3) 0.5599(5) 0.52713(19) 0.0202(8) Uani 1 1 d . . . 
O7 O 0.6617(4) 0.4112(5) 0.6371(2) 0.0249(9) Uani 1 1 d . . . 
O8 O 0.5043(4) 0.6013(5) 0.5794(2) 0.0225(9) Uani 1 1 d . . . 
O9 O 0.2445(4) 0.9280(5) 0.1156(2) 0.0301(10) Uani 1 1 d . . . 
O10 O 0.2155(4) 0.7687(5) 0.2283(2) 0.0280(10) Uani 1 1 d . . . 
O11 O 0.2347(4) 1.0682(5) 0.2356(2) 0.0283(10) Uani 1 1 d . . . 
O12 O 0.0545(3) 0.9432(5) 0.1711(2) 0.0274(10) Uani 1 1 d . . . 
H12 H 0.0140 0.9582 0.1250 0.033 Uiso 1 1 d R . . 
O13 O -0.0639(5) 0.8951(8) 0.0413(3) 0.0640(18) Uani 1 1 d . . . 
N1 N 1.1136(6) 0.3779(11) 0.2286(4) 0.076(3) Uani 1 1 d . . . 
H1 H 1.1227 0.2892 0.2555 0.091 Uiso 1 1 calc R . . 
H2 H 1.0838 0.4557 0.2539 0.091 Uiso 1 1 calc R . . 
H3 H 1.1838 0.4085 0.2165 0.091 Uiso 1 1 calc R . . 
C1 C 1.0343(10) 0.3463(11) 0.1646(6) 0.071(3) Uani 1 1 d . . . 
H1A H 1.0791 0.2985 0.1288 0.085 Uiso 1 1 calc R . . 
H1B H 0.9757 0.2683 0.1759 0.085 Uiso 1 1 calc R . . 
C2 C 0.9741(9) 0.4839(13) 0.1338(5) 0.073(3) Uani 1 1 d D . . 
H2A H 1.0272 0.5638 0.1174 0.088 Uiso 1 1 calc R . . 
H2B H 0.9215 0.5324 0.1650 0.088 Uiso 1 1 calc R . . 
C3 C 0.909(2) 0.386(3) 0.0722(12) 0.290(17) Uani 1 1 d D . . 
H3A H 0.9604 0.3695 0.0349 0.348 Uiso 1 1 calc R . . 
H3B H 0.8884 0.2816 0.0903 0.348 Uiso 1 1 calc R . . 
C4 C 0.7973(14) 0.470(2) 0.0401(11) 0.154(7) Uani 1 1 d D . . 
H4A H 0.7575 0.5050 0.0807 0.185 Uiso 1 1 calc R . . 
H4B H 0.8231 0.5672 0.0175 0.185 Uiso 1 1 calc R . . 
C5 C 0.7039(7) 0.3982(9) -0.0131(4) 0.0434(19) Uani 1 1 d . . . 
H5A H 0.6661 0.4820 -0.0440 0.052 Uiso 1 1 calc R . . 
H5B H 0.7402 0.3226 -0.0435 0.052 Uiso 1 1 calc R . . 
N2 N 0.6136(5) 0.3151(6) 0.0232(3) 0.0295(12) Uani 1 1 d . . . 
H4 H 0.5598 0.2713 -0.0100 0.035 Uiso 1 1 calc R . . 
H5 H 0.5781 0.3850 0.0497 0.035 Uiso 1 1 calc R . . 
H6 H 0.6481 0.2384 0.0518 0.035 Uiso 1 1 calc R . . 
 
loop_ 
 _atom_site_aniso_label 
 _atom_site_aniso_U_11 
 _atom_site_aniso_U_22 
 _atom_site_aniso_U_33 
 _atom_site_aniso_U_23 
 _atom_site_aniso_U_13 
 _atom_site_aniso_U_12 
Zn1 0.0219(4) 0.0133(3) 0.0167(3) -0.0001(2) 0.0034(2) -0.0015(3) 
Zn2 0.0242(4) 0.0139(3) 0.0158(3) -0.0002(2) 0.0022(2) 0.0008(3) 
Zn3 0.0211(3) 0.0142(3) 0.0138(3) 0.0016(2) 0.0033(2) 0.0011(3) 
P1 0.0218(7) 0.0095(6) 0.0130(6) 0.0009(5) 0.0015(5) 0.0004(6) 
P2 0.0199(7) 0.0120(7) 0.0126(7) -0.0004(5) 0.0026(5) 0.0005(5) 
P3 0.0180(7) 0.0155(7) 0.0175(7) -0.0003(5) 0.0027(6) -0.0006(6) 
O1 0.033(2) 0.015(2) 0.018(2) 0.0048(16) 0.0003(17) -0.0003(17) 
O2 0.024(2) 0.017(2) 0.024(2) 0.0041(17) 0.0047(16) -0.0025(17) 
O3 0.030(2) 0.0151(19) 0.021(2) 0.0030(16) 0.0075(17) 0.0040(17) 
O4 0.022(2) 0.017(2) 0.019(2) -0.0043(15) 0.0021(15) -0.0043(17) 
O5 0.024(2) 0.019(2) 0.023(2) -0.0103(16) 0.0057(16) -0.0023(17) 
O6 0.024(2) 0.025(2) 0.0125(18) -0.0006(16) 0.0037(15) 0.0019(18) 
O7 0.038(3) 0.015(2) 0.023(2) 0.0045(16) 0.0072(18) 0.0053(17) 
O8 0.025(2) 0.018(2) 0.024(2) 0.0018(16) 0.0021(17) -0.0024(16) 
O9 0.037(3) 0.030(2) 0.026(2) -0.0040(18) 0.0133(19) -0.015(2) 
O10 0.027(2) 0.024(2) 0.033(2) 0.0072(18) 0.0004(19) 0.0020(18) 
O11 0.031(2) 0.024(2) 0.029(2) -0.0076(18) 0.0002(18) -0.0005(19) 
O12 0.017(2) 0.034(3) 0.029(2) 0.0011(19) -0.0040(17) 0.0037(19) 
O13 0.034(3) 0.112(6) 0.045(3) -0.002(3) -0.004(2) -0.002(3) 
N1 0.031(4) 0.133(8) 0.067(5) 0.053(5) 0.015(4) 0.016(4) 
C1 0.094(8) 0.042(5) 0.076(7) 0.003(5) 0.006(6) 0.011(5) 
C2 0.076(7) 0.077(7) 0.061(6) -0.018(5) -0.015(5) 0.018(6) 
C3 0.26(3) 0.40(5) 0.20(3) 0.01(3) 0.00(3) 0.02(3) 
C4 0.102(12) 0.138(15) 0.23(2) -0.047(14) 0.055(13) -0.068(11) 
C5 0.044(5) 0.036(4) 0.053(5) 0.002(3) 0.015(4) -0.010(3) 
N2 0.041(3) 0.021(3) 0.026(3) 0.000(2) 0.003(2) -0.002(2) 
 
_geom_special_details 
; 
 All esds (except the esd in the dihedral angle between two l.s. planes) 
 are estimated using the full covariance matrix.  The cell esds are taken 
 into account individually in the estimation of esds in distances, angles 
 and torsion angles; correlations between esds in cell parameters are only 
 used when they are defined by crystal symmetry.  An approximate (isotropic) 
 treatment of cell esds is used for estimating esds involving l.s. planes. 
; 
 
loop_ 
 _geom_bond_atom_site_label_1 
 _geom_bond_atom_site_label_2 
 _geom_bond_distance 
 _geom_bond_site_symmetry_2 
 _geom_bond_publ_flag 
Zn1 O5 1.908(4) 4_575 y 
Zn1 O3 1.929(4) 2_645 y 
Zn1 O11 1.930(4) 2_645 y 
Zn1 O4 2.005(4) . y 
Zn2 O10 1.909(4) . y 
Zn2 O7 1.929(4) 3_666 y 
Zn2 O2 1.952(4) 2_645 y 
Zn2 O4 1.966(4) . y 
Zn3 O1 1.923(4) . y 
Zn3 O9 1.929(4) 2_645 y 
Zn3 O6 1.944(4) . y 
Zn3 O8 1.959(4) 3_666 y 
P1 O1 1.514(4) . y 
P1 O2 1.519(4) . y 
P1 O3 1.530(4) . y 
P1 O4 1.570(4) . y 
P2 O5 1.532(4) . y 
P2 O6 1.537(4) . y 
P2 O8 1.537(4) . y 
P2 O7 1.539(4) . y 
P3 O9 1.509(4) . y 
P3 O10 1.517(4) . y 
P3 O11 1.522(4) . y 
P3 O12 1.588(4) . y 
O2 Zn2 1.952(4) 2_655 ? 
O3 Zn1 1.929(4) 2_655 ? 
O5 Zn1 1.908(4) 4_576 ? 
O7 Zn2 1.929(4) 3_666 ? 
O8 Zn3 1.959(4) 3_666 ? 
O9 Zn3 1.929(4) 2_655 ? 
O11 Zn1 1.930(4) 2_655 ? 
O12 H12 0.9300 . ? 
N1 C1 1.425(11) . ? 
N1 H1 0.8900 . ? 
N1 H2 0.8900 . ? 
N1 H3 0.8900 . ? 
C1 C2 1.417(12) . ? 
C1 H1A 0.9700 . ? 
C1 H1B 0.9700 . ? 
C2 C3 1.521(5) . ? 
C2 H2A 0.9700 . ? 
C2 H2B 0.9700 . ? 
C3 C4 1.503(5) . ? 
C3 H3A 0.9700 . ? 
C3 H3B 0.9700 . ? 
C4 C5 1.484(17) . ? 
C4 H4A 0.9700 . ? 
C4 H4B 0.9700 . ? 
C5 N2 1.464(8) . ? 
C5 H5A 0.9700 . ? 
C5 H5B 0.9700 . ? 
N2 H4 0.8900 . ? 
N2 H5 0.8900 . ? 
N2 H6 0.8900 . ? 
 
loop_ 
 _geom_angle_atom_site_label_1 
 _geom_angle_atom_site_label_2 
 _geom_angle_atom_site_label_3 
 _geom_angle 
 _geom_angle_site_symmetry_1 
 _geom_angle_site_symmetry_3 
 _geom_angle_publ_flag 
O5 Zn1 O3 116.42(17) 4_575 2_645 ? 
O5 Zn1 O11 99.84(17) 4_575 2_645 ? 
O3 Zn1 O11 111.23(18) 2_645 2_645 ? 
O5 Zn1 O4 112.95(16) 4_575 . ? 
O3 Zn1 O4 107.26(16) 2_645 . ? 
O11 Zn1 O4 108.87(17) 2_645 . ? 
O10 Zn2 O7 107.62(18) . 3_666 ? 
O10 Zn2 O2 102.67(17) . 2_645 ? 
O7 Zn2 O2 112.15(17) 3_666 2_645 ? 
O10 Zn2 O4 120.35(17) . . ? 
O7 Zn2 O4 106.52(17) 3_666 . ? 
O2 Zn2 O4 107.60(16) 2_645 . ? 
O1 Zn3 O9 115.35(18) . 2_645 ? 
O1 Zn3 O6 104.59(16) . . ? 
O9 Zn3 O6 102.41(17) 2_645 . ? 
O1 Zn3 O8 119.91(17) . 3_666 ? 
O9 Zn3 O8 106.04(18) 2_645 3_666 ? 
O6 Zn3 O8 106.82(16) . 3_666 ? 
O1 P1 O2 111.1(2) . . ? 
O1 P1 O3 108.5(2) . . ? 
O2 P1 O3 111.4(2) . . ? 
O1 P1 O4 110.4(2) . . ? 
O2 P1 O4 107.6(2) . . ? 
O3 P1 O4 107.8(2) . . ? 
O5 P2 O6 109.3(2) . . ? 
O5 P2 O8 110.2(2) . . ? 
O6 P2 O8 110.0(2) . . ? 
O5 P2 O7 110.5(2) . . ? 
O6 P2 O7 106.5(2) . . ? 
O8 P2 O7 110.2(2) . . ? 
O9 P3 O10 113.7(3) . . ? 
O9 P3 O11 113.4(2) . . ? 
O10 P3 O11 111.0(2) . . ? 
O9 P3 O12 107.7(2) . . ? 
O10 P3 O12 105.3(2) . . ? 
O11 P3 O12 105.1(2) . . ? 
P1 O1 Zn3 139.8(2) . . y 
P1 O2 Zn2 131.5(2) . 2_655 y 
P1 O3 Zn1 131.2(2) . 2_655 y 
P1 O4 Zn2 119.0(2) . . y 
P1 O4 Zn1 120.1(2) . . y 
Zn2 O4 Zn1 118.50(18) . . y 
P2 O5 Zn1 129.7(2) . 4_576 y 
P2 O6 Zn3 132.9(2) . . y 
P2 O7 Zn2 130.5(2) . 3_666 y 
P2 O8 Zn3 132.1(2) . 3_666 y 
P3 O9 Zn3 136.2(3) . 2_655 y 
P3 O10 Zn2 134.4(3) . . y 
P3 O11 Zn1 138.6(3) . 2_655 y 
P3 O12 H12 123.8 . . ? 
C1 N1 H1 109.5 . . ? 
C1 N1 H2 109.5 . . ? 
H1 N1 H2 109.5 . . ? 
C1 N1 H3 109.5 . . ? 
H1 N1 H3 109.5 . . ? 
H2 N1 H3 109.5 . . ? 
C2 C1 N1 114.3(8) . . ? 
C2 C1 H1A 108.7 . . ? 
N1 C1 H1A 108.7 . . ? 
C2 C1 H1B 108.7 . . ? 
N1 C1 H1B 108.7 . . ? 
H1A C1 H1B 107.6 . . ? 
C1 C2 C3 92.2(11) . . ? 
C1 C2 H2A 113.3 . . ? 
C3 C2 H2A 113.2 . . ? 
C1 C2 H2B 113.3 . . ? 
C3 C2 H2B 113.2 . . ? 
H2A C2 H2B 110.6 . . ? 
C4 C3 C2 111.0(14) . . ? 
C4 C3 H3A 109.4 . . ? 
C2 C3 H3A 109.4 . . ? 
C4 C3 H3B 109.5 . . ? 
C2 C3 H3B 109.4 . . ? 
H3A C3 H3B 108.0 . . ? 
C5 C4 C3 125.0(12) . . ? 
C5 C4 H4A 106.1 . . ? 
C3 C4 H4A 106.1 . . ? 
C5 C4 H4B 106.1 . . ? 
C3 C4 H4B 106.1 . . ? 
H4A C4 H4B 106.3 . . ? 
N2 C5 C4 111.5(9) . . ? 
N2 C5 H5A 109.3 . . ? 
C4 C5 H5A 109.3 . . ? 
N2 C5 H5B 109.3 . . ? 
C4 C5 H5B 109.4 . . ? 
H5A C5 H5B 108.0 . . ? 
C5 N2 H4 109.5 . . ? 
C5 N2 H5 109.5 . . ? 
H4 N2 H5 109.5 . . ? 
C5 N2 H6 109.5 . . ? 
H4 N2 H6 109.5 . . ? 
H5 N2 H6 109.5 . . ? 
 
loop_ 
 _geom_torsion_atom_site_label_1 
 _geom_torsion_atom_site_label_2 
 _geom_torsion_atom_site_label_3 
 _geom_torsion_atom_site_label_4 
 _geom_torsion 
 _geom_torsion_site_symmetry_1 
 _geom_torsion_site_symmetry_2 
 _geom_torsion_site_symmetry_3 
 _geom_torsion_site_symmetry_4 
 _geom_torsion_publ_flag 
O2 P1 O1 Zn3 -119.2(4) . . . . ? 
O3 P1 O1 Zn3 118.0(4) . . . . ? 
O4 P1 O1 Zn3 0.1(5) . . . . ? 
O9 Zn3 O1 P1 72.2(4) 2_645 . . . ? 
O6 Zn3 O1 P1 -176.2(4) . . . . ? 
O8 Zn3 O1 P1 -56.5(5) 3_666 . . . ? 
O1 P1 O2 Zn2 -161.8(3) . . . 2_655 ? 
O3 P1 O2 Zn2 -40.7(4) . . . 2_655 ? 
O4 P1 O2 Zn2 77.3(3) . . . 2_655 ? 
O1 P1 O3 Zn1 165.3(3) . . . 2_655 ? 
O2 P1 O3 Zn1 42.7(4) . . . 2_655 ? 
O4 P1 O3 Zn1 -75.2(3) . . . 2_655 ? 
O1 P1 O4 Zn2 81.2(3) . . . . ? 
O2 P1 O4 Zn2 -157.4(2) . . . . ? 
O3 P1 O4 Zn2 -37.1(3) . . . . ? 
O1 P1 O4 Zn1 -81.1(3) . . . . ? 
O2 P1 O4 Zn1 40.3(3) . . . . ? 
O3 P1 O4 Zn1 160.6(2) . . . . ? 
O10 Zn2 O4 P1 81.2(3) . . . . ? 
O7 Zn2 O4 P1 -41.4(3) 3_666 . . . ? 
O2 Zn2 O4 P1 -161.9(2) 2_645 . . . ? 
O10 Zn2 O4 Zn1 -116.2(2) . . . . ? 
O7 Zn2 O4 Zn1 121.2(2) 3_666 . . . ? 
O2 Zn2 O4 Zn1 0.7(3) 2_645 . . . ? 
O5 Zn1 O4 P1 -67.6(3) 4_575 . . . ? 
O3 Zn1 O4 P1 162.8(2) 2_645 . . . ? 
O11 Zn1 O4 P1 42.4(3) 2_645 . . . ? 
O5 Zn1 O4 Zn2 130.1(2) 4_575 . . . ? 
O3 Zn1 O4 Zn2 0.5(3) 2_645 . . . ? 
O11 Zn1 O4 Zn2 -120.0(2) 2_645 . . . ? 
O6 P2 O5 Zn1 142.7(3) . . . 4_576 ? 
O8 P2 O5 Zn1 21.7(4) . . . 4_576 ? 
O7 P2 O5 Zn1 -100.4(3) . . . 4_576 ? 
O5 P2 O6 Zn3 -130.9(3) . . . . ? 
O8 P2 O6 Zn3 -9.8(4) . . . . ? 
O7 P2 O6 Zn3 109.7(3) . . . . ? 
O1 Zn3 O6 P2 87.6(3) . . . . ? 
O9 Zn3 O6 P2 -151.8(3) 2_645 . . . ? 
O8 Zn3 O6 P2 -40.5(4) 3_666 . . . ? 
O5 P2 O7 Zn2 46.5(4) . . . 3_666 ? 
O6 P2 O7 Zn2 165.1(3) . . . 3_666 ? 
O8 P2 O7 Zn2 -75.5(4) . . . 3_666 ? 
O5 P2 O8 Zn3 -140.6(3) . . . 3_666 ? 
O6 P2 O8 Zn3 98.8(3) . . . 3_666 ? 
O7 P2 O8 Zn3 -18.3(4) . . . 3_666 ? 
O10 P3 O9 Zn3 -114.8(4) . . . 2_655 ? 
O11 P3 O9 Zn3 13.1(5) . . . 2_655 ? 
O12 P3 O9 Zn3 128.9(4) . . . 2_655 ? 
O9 P3 O10 Zn2 58.2(4) . . . . ? 
O11 P3 O10 Zn2 -70.9(4) . . . . ? 
O12 P3 O10 Zn2 175.8(3) . . . . ? 
O7 Zn2 O10 P3 132.4(4) 3_666 . . . ? 
O2 Zn2 O10 P3 -109.1(4) 2_645 . . . ? 
O4 Zn2 O10 P3 10.3(5) . . . . ? 
O9 P3 O11 Zn1 -76.2(5) . . . 2_655 ? 
O10 P3 O11 Zn1 53.1(5) . . . 2_655 ? 
O12 P3 O11 Zn1 166.4(4) . . . 2_655 ? 
N1 C1 C2 C3 179.6(14) . . . . ? 
C1 C2 C3 C4 158(2) . . . . ? 
C2 C3 C4 C5 -170.4(15) . . . . ? 
C3 C4 C5 N2 89(2) . . . . ? 

loop_ 
 _geom_hbond_atom_site_label_D 
 _geom_hbond_atom_site_label_H 
 _geom_hbond_atom_site_label_A 
 _geom_hbond_distance_DH 
 _geom_hbond_distance_HA 
 _geom_hbond_distance_DA 
 _geom_hbond_angle_DHA 
 _geom_hbond_site_symmetry_A 

O12 H12 O13  0.93 1.77 2.644(7) 155 .
N1 H1 O11    0.89 2.29 2.915(9) 127 1_645 
N1 H2 O12    0.89 2.22 2.874(9) 130 2_645 
N1 H3 O2     0.89 1.92 2.806(8) 174 2_745 
N2 H4 O8     0.89 1.99 2.823(6) 155 2_645 
N2 H5 O3     0.89 2.11 2.902(6) 148 2_645 
N2 H6 O7     0.89 2.01 2.837(7) 154 4_565 

_diffrn_measured_fraction_theta_max    0.977 
_diffrn_reflns_theta_full              30.00 
_diffrn_measured_fraction_theta_full   0.977 
_refine_diff_density_max    1.972 
_refine_diff_density_min   -0.845 
_refine_diff_density_rms    0.174 
