# Supplementary material
Source: MDPI journal article supplement (https://www.mdpi.com/2073-4352/2/3/974)
Supplement: s2 [file s2]

 
data_wc02 
 
_audit_creation_method            SHELXL-97 
_chemical_name_systematic 
; 
 ? 
; 
_chemical_name_common             ? 
_chemical_melting_point           ? 
_chemical_formula_moiety          'C10 H28 N4 O8 P2 Zn3, 3(H2 O)'
_chemical_formula_sum             'C10 H34 N4 O11 P2 Zn3' 
_chemical_formula_weight          644.46 
_chemical_absolute_configuration  ad
 
loop_ 
 _atom_type_symbol 
 _atom_type_description 
 _atom_type_scat_dispersion_real 
 _atom_type_scat_dispersion_imag 
 _atom_type_scat_source 
 'C'  'C'   0.0033   0.0016 
 'International Tables Vol C Tables 4.2.6.8 and 6.1.1.4' 
 'H'  'H'   0.0000   0.0000 
 'International Tables Vol C Tables 4.2.6.8 and 6.1.1.4' 
 'N'  'N'   0.0061   0.0033 
 'International Tables Vol C Tables 4.2.6.8 and 6.1.1.4' 
 'O'  'O'   0.0106   0.0060 
 'International Tables Vol C Tables 4.2.6.8 and 6.1.1.4' 
 'P'  'P'   0.1023   0.0942 
 'International Tables Vol C Tables 4.2.6.8 and 6.1.1.4' 
 'Zn'  'Zn'   0.2839   1.4301 
 'International Tables Vol C Tables 4.2.6.8 and 6.1.1.4' 
 
_symmetry_cell_setting            monoclinic 
_symmetry_space_group_name_H-M    'C 2' 
 
loop_ 
 _symmetry_equiv_pos_as_xyz 
 'x, y, z' 
 '-x, y, -z' 
 'x+1/2, y+1/2, z' 
 '-x+1/2, y+1/2, -z' 
 
_cell_length_a                    25.302(7) 
_cell_length_b                    4.9327(13) 
_cell_length_c                    19.808(6) 
_cell_angle_alpha                 90.00 
_cell_angle_beta                  107.377(8) 
_cell_angle_gamma                 90.00 
_cell_volume                      2359.4(12) 
_cell_formula_units_Z             4 
_cell_measurement_temperature     93(2) 
_cell_measurement_reflns_used     3414 
_cell_measurement_theta_min       1.71 
_cell_measurement_theta_max       28.66 
 
_exptl_crystal_description        slab
_exptl_crystal_colour             colourless 
_exptl_crystal_size_max           0.10 
_exptl_crystal_size_mid           0.10 
_exptl_crystal_size_min           0.02 
_exptl_crystal_density_meas       ? 
_exptl_crystal_density_diffrn     1.814 
_exptl_crystal_density_method     'not measured' 
_exptl_crystal_F_000              1320 
_exptl_absorpt_coefficient_mu     3.216 
_exptl_absorpt_correction_type    multi-scan
_exptl_absorpt_correction_T_min   0.7392 
_exptl_absorpt_correction_T_max   0.9385 
_exptl_absorpt_process_details    'SADABS ' 
 
_exptl_special_details 
; 
 ? 
; 
 
_diffrn_ambient_temperature       93(2) 
_diffrn_radiation_wavelength      0.71073 
_diffrn_radiation_type            MoK\a 
_diffrn_radiation_source          'fine-focus sealed tube' 
_diffrn_radiation_monochromator   graphite 
_diffrn_measurement_device_type   CCD
_diffrn_measurement_method        'omega scan' 
_diffrn_detector_area_resol_mean  ? 
_diffrn_standards_number          ? 
_diffrn_standards_interval_count  ? 
_diffrn_standards_interval_time   ? 
_diffrn_standards_decay_%         0 
_diffrn_reflns_number             7612 
_diffrn_reflns_av_R_equivalents   0.0469 
_diffrn_reflns_av_sigmaI/netI     0.0701 
_diffrn_reflns_limit_h_min        -30 
_diffrn_reflns_limit_h_max        30 
_diffrn_reflns_limit_k_min        -5 
_diffrn_reflns_limit_k_max        3 
_diffrn_reflns_limit_l_min        -23 
_diffrn_reflns_limit_l_max        18 
_diffrn_reflns_theta_min          1.71 
_diffrn_reflns_theta_max          25.36 
_reflns_number_total              3310 
_reflns_number_gt                 2728 
_reflns_threshold_expression      >2sigma(I) 
 
_computing_data_collection        ? 
_computing_cell_refinement        ? 
_computing_data_reduction         ? 
_computing_structure_solution     'SHELXS-97 (Sheldrick, 1990)' 
_computing_structure_refinement   'SHELXL-97 (Sheldrick, 1997)' 
_computing_molecular_graphics     ? 
_computing_publication_material   ? 
 
_refine_special_details 
; 
 Refinement of F^2^ against ALL reflections.  The weighted R-factor wR and 
 goodness of fit S are based on F^2^, conventional R-factors R are based 
 on F, with F set to zero for negative F^2^. The threshold expression of 
 F^2^ > 2sigma(F^2^) is used only for calculating R-factors(gt) etc. and is 
 not relevant to the choice of reflections for refinement.  R-factors based 
 on F^2^ are statistically about twice as large as those based on F, and R- 
 factors based on ALL data will be even larger. 
; 
 
_refine_ls_structure_factor_coef  Fsqd  
_refine_ls_matrix_type            full 
_refine_ls_weighting_scheme       calc  
_refine_ls_weighting_details 
 'calc w=1/[\s^2^(Fo^2^)+(0.0627P)^2^+11.1434P] where P=(Fo^2^+2Fc^2^)/3' 
_atom_sites_solution_primary      direct 
_atom_sites_solution_secondary    difmap 
_atom_sites_solution_hydrogens    'difmap and geom' 
_refine_ls_hydrogen_treatment     constr 
_refine_ls_extinction_method      none 
_refine_ls_extinction_coef        ? 
_refine_ls_abs_structure_details 
 'Flack H D (1983), Acta Cryst. A39, 876-881' 
_refine_ls_abs_structure_Flack    0.46(5) 
_refine_ls_number_reflns          3310 
_refine_ls_number_parameters      273 
_refine_ls_number_restraints      2 
_refine_ls_R_factor_all           0.0667 
_refine_ls_R_factor_gt            0.0537 
_refine_ls_wR_factor_ref          0.1391 
_refine_ls_wR_factor_gt           0.1260 
_refine_ls_goodness_of_fit_ref    1.056 
_refine_ls_restrained_S_all       1.055 
_refine_ls_shift/su_max           0.000 
_refine_ls_shift/su_mean          0.000 
 
loop_ 
 _atom_site_label 
 _atom_site_type_symbol 
 _atom_site_fract_x 
 _atom_site_fract_y 
 _atom_site_fract_z 
 _atom_site_U_iso_or_equiv 
 _atom_site_adp_type 
 _atom_site_occupancy 
 _atom_site_symmetry_multiplicity 
 _atom_site_calc_flag 
 _atom_site_refinement_flags 
 _atom_site_disorder_assembly 
 _atom_site_disorder_group 
Zn1 Zn 0.0000 0.9568(5) 0.0000 0.0164(5) Uani 1 2 d S . . 
Zn2 Zn 0.0000 0.0701(5) 0.5000 0.0153(5) Uani 1 2 d S . . 
Zn3 Zn 0.05890(5) 0.2927(3) 0.23723(6) 0.0162(4) Uani 1 1 d . . . 
Zn4 Zn -0.05574(5) 0.7320(3) 0.26317(6) 0.0165(4) Uani 1 1 d . . . 
P1 P -0.00784(12) 0.2539(9) 0.34901(16) 0.0155(7) Uani 1 1 d U . . 
P2 P 0.01269(12) 0.7715(10) 0.15126(16) 0.0156(8) Uani 1 1 d . . . 
O1 O 0.0416(3) 0.355(2) 0.3246(3) 0.023(3) Uani 1 1 d . . . 
O2 O -0.0628(3) 0.383(2) 0.3047(4) 0.018(2) Uani 1 1 d . . . 
O3 O 0.0043(3) 0.322(2) 0.4282(3) 0.018(2) Uani 1 1 d . . . 
O4 O -0.0112(3) -0.052(2) 0.3422(4) 0.0207(18) Uani 1 1 d U . . 
O5 O -0.0004(3) 0.691(2) 0.0736(3) 0.019(2) Uani 1 1 d . . . 
O6 O 0.0678(3) 0.640(2) 0.1954(4) 0.023(2) Uani 1 1 d . . . 
O7 O -0.0348(3) 0.662(2) 0.1782(4) 0.021(3) Uani 1 1 d . . . 
O8 O 0.0164(4) 1.082(2) 0.1586(4) 0.024(2) Uani 1 1 d . . . 
N1 N 0.1334(3) 0.104(3) 0.2742(4) 0.019(3) Uani 1 1 d . . . 
H1A H 0.1326 -0.0049 0.3116 0.023 Uiso 1 1 calc R . . 
H1B H 0.1381 -0.0069 0.2391 0.023 Uiso 1 1 calc R . . 
C1 C 0.1820(4) 0.287(4) 0.2978(6) 0.027(3) Uani 1 1 d . . . 
H1C H 0.1768 0.4099 0.3347 0.033 Uiso 1 1 calc R . . 
H1D H 0.1840 0.3994 0.2573 0.033 Uiso 1 1 calc R . . 
C2 C 0.2373(4) 0.134(3) 0.3275(6) 0.025(3) Uani 1 1 d . . . 
H2A H 0.2445 0.0230 0.2896 0.030 Uiso 1 1 calc R . . 
H2B H 0.2347 0.0106 0.3658 0.030 Uiso 1 1 calc R . . 
C3 C 0.2856(4) 0.334(3) 0.3568(6) 0.025(3) Uani 1 1 d . . . 
H3A H 0.2899 0.4452 0.3172 0.030 Uiso 1 1 calc R . . 
H3B H 0.2760 0.4572 0.3907 0.030 Uiso 1 1 calc R . . 
C4 C 0.3400(4) 0.201(3) 0.3930(5) 0.018(3) Uani 1 1 d . . . 
H4A H 0.3525 0.0942 0.3582 0.021 Uiso 1 1 calc R . . 
H4B H 0.3355 0.0748 0.4298 0.021 Uiso 1 1 calc R . . 
C5 C 0.3835(4) 0.416(3) 0.4270(6) 0.023(3) Uani 1 1 d . . . 
H5A H 0.3889 0.5356 0.3894 0.027 Uiso 1 1 calc R . . 
H5B H 0.3695 0.5295 0.4592 0.027 Uiso 1 1 calc R . . 
N2 N 0.4373(3) 0.299(3) 0.4670(4) 0.017(3) Uani 1 1 d . . . 
H2C H 0.4471 0.1717 0.4392 0.020 Uiso 1 1 calc R . . 
H2D H 0.4330 0.2112 0.5060 0.020 Uiso 1 1 calc R . . 
N3 N 0.0636(3) 1.228(3) 0.0286(4) 0.021(3) Uani 1 1 d . . . 
H3C H 0.0641 1.3237 -0.0110 0.025 Uiso 1 1 calc R . . 
H3D H 0.0562 1.3490 0.0599 0.025 Uiso 1 1 calc R . . 
C6 C 0.1190(4) 1.114(3) 0.0610(6) 0.020(3) Uani 1 1 d . . . 
H6A H 0.1275 0.9896 0.0265 0.024 Uiso 1 1 calc R . . 
H6B H 0.1179 1.0046 0.1024 0.024 Uiso 1 1 calc R . . 
C7 C 0.1660(4) 1.317(3) 0.0850(5) 0.027(3) Uani 1 1 d . . . 
H7A H 0.1680 1.4242 0.0436 0.032 Uiso 1 1 calc R . . 
H7B H 0.1578 1.4432 0.1193 0.032 Uiso 1 1 calc R . . 
C8 C 0.2218(4) 1.187(3) 0.1188(6) 0.030(3) Uani 1 1 d . . . 
H8A H 0.2182 1.0623 0.1564 0.036 Uiso 1 1 calc R . . 
H8B H 0.2315 1.0759 0.0826 0.036 Uiso 1 1 calc R . . 
C9 C 0.2681(4) 1.376(3) 0.1501(6) 0.032(3) Uani 1 1 d . . . 
H9A H 0.2577 1.4939 0.1846 0.038 Uiso 1 1 calc R . . 
H9B H 0.2732 1.4941 0.1121 0.038 Uiso 1 1 calc R . . 
C10 C 0.3226(4) 1.242(3) 0.1869(6) 0.022(3) Uani 1 1 d . . . 
H10A H 0.3170 1.1205 0.2240 0.027 Uiso 1 1 calc R . . 
H10B H 0.3330 1.1261 0.1520 0.027 Uiso 1 1 calc R . . 
N4 N 0.3696(3) 1.422(3) 0.2199(5) 0.025(3) Uani 1 1 d . . . 
H4C H 0.3612 1.5206 0.2548 0.029 Uiso 1 1 calc R . . 
H4D H 0.3734 1.5434 0.1863 0.029 Uiso 1 1 calc R . . 
O10 O 0.1001(3) 1.246(3) -0.1105(4) 0.028(2) Uani 1 1 d . . . 
H1W H 0.0893 1.4106 -0.1294 0.034 Uiso 1 1 d R . . 
H2W H 0.0712 1.1400 -0.1332 0.034 Uiso 1 1 d R . . 
O11 O 0.1063(3) 0.771(3) 0.3948(4) 0.025(2) Uani 1 1 d . . . 
H3W H 0.0816 0.8983 0.3998 0.030 Uiso 1 1 d R . . 
H4W H 0.0842 0.6295 0.3762 0.030 Uiso 1 1 d R . . 
O12 O 0.2758(3) 0.2091(19) 0.5260(4) 0.043(2) Uani 1 1 d . . . 
H5W H 0.3123 0.2465 0.5428 0.052 Uiso 1 1 d R . . 
H6W H 0.2625 0.3592 0.5009 0.052 Uiso 1 1 d R . . 
 
loop_ 
 _atom_site_aniso_label 
 _atom_site_aniso_U_11 
 _atom_site_aniso_U_22 
 _atom_site_aniso_U_33 
 _atom_site_aniso_U_23 
 _atom_site_aniso_U_13 
 _atom_site_aniso_U_12 
Zn1 0.0169(9) 0.0125(15) 0.0187(10) 0.000 0.0037(7) 0.000 
Zn2 0.0180(9) 0.0120(15) 0.0149(10) 0.000 0.0033(7) 0.000 
Zn3 0.0188(6) 0.0157(12) 0.0135(7) 0.0014(7) 0.0039(5) 0.0008(7) 
Zn4 0.0178(6) 0.0125(12) 0.0183(7) -0.0005(7) 0.0043(5) 0.0003(7) 
P1 0.0212(14) 0.009(2) 0.0154(15) 0.0009(15) 0.0041(11) 0.0006(18) 
P2 0.0192(13) 0.015(2) 0.0123(15) -0.0015(16) 0.0041(11) -0.0006(17) 
O1 0.024(4) 0.033(8) 0.014(4) 0.000(4) 0.006(3) -0.007(4) 
O2 0.023(4) 0.006(6) 0.025(5) 0.004(4) 0.007(3) -0.003(4) 
O3 0.027(4) 0.004(6) 0.024(4) 0.000(4) 0.008(3) 0.000(4) 
O4 0.022(4) 0.008(2) 0.025(4) -0.001(5) -0.003(3) 0.009(4) 
O5 0.031(4) 0.017(7) 0.007(4) 0.001(4) 0.004(3) -0.003(5) 
O6 0.019(4) 0.021(7) 0.024(5) 0.000(4) -0.001(3) 0.006(4) 
O7 0.021(4) 0.025(7) 0.021(4) -0.006(4) 0.013(3) -0.005(4) 
O8 0.035(5) 0.023(5) 0.010(4) 0.005(5) 0.005(3) -0.001(5) 
N1 0.019(5) 0.021(8) 0.016(5) -0.004(5) 0.004(4) -0.004(6) 
C1 0.019(5) 0.035(10) 0.022(5) -0.005(6) -0.004(4) 0.002(6) 
C2 0.026(5) 0.019(7) 0.023(6) -0.008(5) -0.002(4) 0.010(5) 
C3 0.021(5) 0.025(7) 0.030(6) -0.001(5) 0.010(4) -0.005(5) 
C4 0.014(5) 0.018(7) 0.022(5) 0.002(5) 0.007(4) -0.004(5) 
C5 0.013(5) 0.021(9) 0.033(6) 0.006(6) 0.005(4) -0.003(6) 
N2 0.021(4) 0.013(7) 0.019(5) -0.003(6) 0.008(3) -0.005(6) 
N3 0.020(4) 0.032(9) 0.008(4) 0.006(6) 0.000(3) -0.001(7) 
C6 0.025(6) 0.023(9) 0.015(5) 0.005(5) 0.011(4) 0.010(6) 
C7 0.019(5) 0.037(9) 0.022(6) -0.010(6) 0.003(4) -0.002(6) 
C8 0.026(6) 0.024(7) 0.037(7) 0.000(6) 0.003(5) 0.003(6) 
C9 0.023(6) 0.037(9) 0.025(6) -0.001(6) -0.008(4) 0.003(6) 
C10 0.020(5) 0.005(7) 0.039(6) 0.005(6) 0.005(4) 0.004(5) 
N4 0.023(5) 0.017(8) 0.030(5) 0.012(5) 0.003(4) -0.011(6) 
O10 0.025(4) 0.028(7) 0.028(4) 0.009(5) 0.001(3) -0.005(6) 
O11 0.027(4) 0.020(6) 0.025(4) 0.002(5) 0.005(3) 0.000(5) 
O12 0.034(4) 0.044(6) 0.049(5) 0.009(4) 0.008(3) -0.006(4) 
 
_geom_special_details 
; 
 All esds (except the esd in the dihedral angle between two l.s. planes) 
 are estimated using the full covariance matrix.  The cell esds are taken 
 into account individually in the estimation of esds in distances, angles 
 and torsion angles; correlations between esds in cell parameters are only 
 used when they are defined by crystal symmetry.  An approximate (isotropic) 
 treatment of cell esds is used for estimating esds involving l.s. planes. 
; 
 
loop_ 
 _geom_bond_atom_site_label_1 
 _geom_bond_atom_site_label_2 
 _geom_bond_distance 
 _geom_bond_site_symmetry_2 
 _geom_bond_publ_flag 
Zn1 O5 1.964(9) 2 ? 
Zn1 O5 1.964(9) . y 
Zn1 N3 2.037(13) . y 
Zn1 N3 2.037(13) 2 ? 
Zn2 O3 1.914(9) 2_556 ? 
Zn2 O3 1.914(9) . y 
Zn2 N2 2.027(11) 4_546 y 
Zn2 N2 2.027(11) 3_445 ? 
Zn3 O8 1.914(10) 1_545 y 
Zn3 O1 1.933(7) . y 
Zn3 O6 1.943(11) . y 
Zn3 N1 2.032(10) . y 
Zn4 O2 1.939(10) . y 
Zn4 O7 1.942(7) . y 
Zn4 O4 1.949(9) 1_565 y 
Zn4 N4 2.055(10) 3_445 y 
P1 O4 1.516(12) . y 
P1 O2 1.542(8) . y 
P1 O3 1.543(8) . y 
P1 O1 1.550(8) . y 
P2 O5 1.526(8) . y 
P2 O8 1.537(13) . y 
P2 O7 1.549(8) . y 
P2 O6 1.551(8) . y 
O4 Zn4 1.949(9) 1_545 n 
O8 Zn3 1.914(10) 1_565 ? 
N1 C1 1.484(17) . ? 
N1 H1A 0.9200 . ? 
N1 H1B 0.9200 . ? 
C1 C2 1.542(17) . ? 
C1 H1C 0.9900 . ? 
C1 H1D 0.9900 . ? 
C2 C3 1.542(16) . ? 
C2 H2A 0.9900 . ? 
C2 H2B 0.9900 . ? 
C3 C4 1.499(15) . ? 
C3 H3A 0.9900 . ? 
C3 H3B 0.9900 . ? 
C4 C5 1.535(17) . ? 
C4 H4A 0.9900 . ? 
C4 H4B 0.9900 . ? 
C5 N2 1.472(14) . ? 
C5 H5A 0.9900 . ? 
C5 H5B 0.9900 . ? 
N2 Zn2 2.027(11) 3 ? 
N2 H2C 0.9200 . ? 
N2 H2D 0.9200 . ? 
N3 C6 1.467(14) . ? 
N3 H3C 0.9200 . ? 
N3 H3D 0.9200 . ? 
C6 C7 1.518(18) . ? 
C6 H6A 0.9900 . ? 
C6 H6B 0.9900 . ? 
C7 C8 1.511(15) . ? 
C7 H7A 0.9900 . ? 
C7 H7B 0.9900 . ? 
C8 C9 1.481(17) . ? 
C8 H8A 0.9900 . ? 
C8 H8B 0.9900 . ? 
C9 C10 1.507(15) . ? 
C9 H9A 0.9900 . ? 
C9 H9B 0.9900 . ? 
C10 N4 1.474(17) . ? 
C10 H10A 0.9900 . ? 
C10 H10B 0.9900 . ? 
N4 Zn4 2.055(10) 3 ? 
N4 H4C 0.9200 . ? 
N4 H4D 0.9200 . ? 
O10 H1W 0.9008 . ? 
O10 H2W 0.9021 . ? 
O11 H3W 0.9116 . ? 
O11 H4W 0.9012 . ? 
O12 H5W 0.9006 . ? 
O12 H6W 0.9002 . ? 
 
loop_ 
 _geom_angle_atom_site_label_1 
 _geom_angle_atom_site_label_2 
 _geom_angle_atom_site_label_3 
 _geom_angle 
 _geom_angle_site_symmetry_1 
 _geom_angle_site_symmetry_3 
 _geom_angle_publ_flag 

O5 Zn1 O5 96.2(6) 2 . ? 
O5 Zn1 N3 117.8(4) 2 . ? 
O5 Zn1 N3 114.3(4) . . ? 
O5 Zn1 N3 114.3(4) 2 2 ? 
O5 Zn1 N3 117.8(4) . 2 ? 
N3 Zn1 N3 98.0(7) . 2 ? 

O3 Zn2 O3 99.2(6) 2_556 . ? 
O3 Zn2 N2 113.6(4) 2_556 4_546 ? 
O3 Zn2 N2 117.0(4) . 4_546 ? 
O3 Zn2 N2 117.0(4) 2_556 3_445 ? 
O3 Zn2 N2 113.6(4) . 3_445 ? 
N2 Zn2 N2 97.6(7) 4_546 3_445 ? 

O8 Zn3 O1 126.3(4) 1_545 . ? 
O8 Zn3 O6 103.9(4) 1_545 . ? 
O1 Zn3 O6 109.2(4) . . ? 
O8 Zn3 N1 106.2(4) 1_545 . ? 
O1 Zn3 N1 100.6(4) . . ? 
O6 Zn3 N1 110.1(4) . . ? 

O2 Zn4 O7 107.1(4) . . ? 
O2 Zn4 O4 104.4(4) . 1_565 ? 
O7 Zn4 O4 123.5(4) . 1_565 ? 
O2 Zn4 N4 113.2(4) . 3_445 ? 
O7 Zn4 N4 100.1(4) . 3_445 ? 
O4 Zn4 N4 108.9(5) 1_565 3_445 ? 

O4 P1 O2 110.1(6) . . ? 
O4 P1 O3 107.1(6) . . ? 
O2 P1 O3 111.2(5) . . ? 
O4 P1 O1 108.7(6) . . ? 
O2 P1 O1 111.3(5) . . ? 
O3 P1 O1 108.3(5) . . ? 

O5 P2 O8 110.1(6) . . ? 
O5 P2 O7 107.4(5) . . ? 
O8 P2 O7 110.2(6) . . ? 
O5 P2 O6 110.3(5) . . ? 
O8 P2 O6 110.2(6) . . ? 
O7 P2 O6 108.6(5) . . ? 

P1 O1 Zn3 130.4(5) . . y 
P1 O2 Zn4 115.3(5) . . y 
P1 O3 Zn2 125.2(7) . . y 
P1 O4 Zn4 128.2(6) . 1_545 y 
P2 O5 Zn1 121.7(7) . . y 
P2 O6 Zn3 114.3(5) . . y 
P2 O7 Zn4 132.6(6) . . y 
P2 O8 Zn3 128.5(6) . 1_565 y 
C1 N1 Zn3 115.4(11) . . ? 
C1 N1 H1A 108.4 . . ? 
Zn3 N1 H1A 108.4 . . ? 
C1 N1 H1B 108.4 . . ? 
Zn3 N1 H1B 108.4 . . ? 
H1A N1 H1B 107.5 . . ? 
N1 C1 C2 113.3(15) . . ? 
N1 C1 H1C 108.9 . . ? 
C2 C1 H1C 108.9 . . ? 
N1 C1 H1D 108.9 . . ? 
C2 C1 H1D 108.9 . . ? 
H1C C1 H1D 107.7 . . ? 
C1 C2 C3 111.1(12) . . ? 
C1 C2 H2A 109.4 . . ? 
C3 C2 H2A 109.4 . . ? 
C1 C2 H2B 109.4 . . ? 
C3 C2 H2B 109.4 . . ? 
H2A C2 H2B 108.0 . . ? 
C4 C3 C2 114.3(12) . . ? 
C4 C3 H3A 108.7 . . ? 
C2 C3 H3A 108.7 . . ? 
C4 C3 H3B 108.7 . . ? 
C2 C3 H3B 108.7 . . ? 
H3A C3 H3B 107.6 . . ? 
C3 C4 C5 110.0(12) . . ? 
C3 C4 H4A 109.7 . . ? 
C5 C4 H4A 109.7 . . ? 
C3 C4 H4B 109.7 . . ? 
C5 C4 H4B 109.7 . . ? 
H4A C4 H4B 108.2 . . ? 
N2 C5 C4 113.1(13) . . ? 
N2 C5 H5A 109.0 . . ? 
C4 C5 H5A 109.0 . . ? 
N2 C5 H5B 109.0 . . ? 
C4 C5 H5B 109.0 . . ? 
H5A C5 H5B 107.8 . . ? 
C5 N2 Zn2 115.1(11) . 3 ? 
C5 N2 H2C 108.5 . . ? 
Zn2 N2 H2C 108.5 3 . ? 
C5 N2 H2D 108.5 . . ? 
Zn2 N2 H2D 108.5 3 . ? 
H2C N2 H2D 107.5 . . ? 
C6 N3 Zn1 116.3(12) . . ? 
C6 N3 H3C 108.2 . . ? 
Zn1 N3 H3C 108.2 . . ? 
C6 N3 H3D 108.2 . . ? 
Zn1 N3 H3D 108.2 . . ? 
H3C N3 H3D 107.4 . . ? 
N3 C6 C7 116.4(14) . . ? 
N3 C6 H6A 108.2 . . ? 
C7 C6 H6A 108.2 . . ? 
N3 C6 H6B 108.2 . . ? 
C7 C6 H6B 108.2 . . ? 
H6A C6 H6B 107.3 . . ? 
C8 C7 C6 113.7(13) . . ? 
C8 C7 H7A 108.8 . . ? 
C6 C7 H7A 108.8 . . ? 
C8 C7 H7B 108.8 . . ? 
C6 C7 H7B 108.8 . . ? 
H7A C7 H7B 107.7 . . ? 
C9 C8 C7 115.8(12) . . ? 
C9 C8 H8A 108.3 . . ? 
C7 C8 H8A 108.3 . . ? 
C9 C8 H8B 108.3 . . ? 
C7 C8 H8B 108.3 . . ? 
H8A C8 H8B 107.4 . . ? 
C8 C9 C10 114.8(13) . . ? 
C8 C9 H9A 108.6 . . ? 
C10 C9 H9A 108.6 . . ? 
C8 C9 H9B 108.6 . . ? 
C10 C9 H9B 108.6 . . ? 
H9A C9 H9B 107.5 . . ? 
N4 C10 C9 116.6(14) . . ? 
N4 C10 H10A 108.1 . . ? 
C9 C10 H10A 108.1 . . ? 
N4 C10 H10B 108.1 . . ? 
C9 C10 H10B 108.1 . . ? 
H10A C10 H10B 107.3 . . ? 
C10 N4 Zn4 115.4(10) . 3 ? 
C10 N4 H4C 108.4 . . ? 
Zn4 N4 H4C 108.4 3 . ? 
C10 N4 H4D 108.4 . . ? 
Zn4 N4 H4D 108.4 3 . ? 
H4C N4 H4D 107.5 . . ? 
H1W O10 H2W 102.5 . . ? 
H3W O11 H4W 102.5 . . ? 
H5W O12 H6W 102.1 . . ? 
 
loop_ 
 _geom_hbond_atom_site_label_D 
 _geom_hbond_atom_site_label_H 
 _geom_hbond_atom_site_label_A 
 _geom_hbond_distance_DH 
 _geom_hbond_distance_HA 
 _geom_hbond_distance_DA 
 _geom_hbond_angle_DHA 
 _geom_hbond_site_symmetry_A 
N1 H1A O11  0.92 2.24 3.138(14) 164 1_545 
N1 H1B O6   0.92 2.46 2.981(16) 116 1_545 
N2 H2C O3   0.92 2.30 3.131(16) 149 3_545 
N2 H2D O11  0.92 2.47 3.245(11) 142 4_546 
N2 H2D O3   0.92 2.58 3.196(16) 125 4_546 
N3 H3C O10  0.92 2.44 3.158(11) 136 . 
N3 H3C O5   0.92 2.49 3.152(16) 129 2_565 
N3 H3D O5   0.92 2.28 3.081(17) 145 1_565 
N4 H4D O10  0.92 2.08 2.971(14) 164 4 
O10 H1W O7  0.90 1.89 2.723(15) 152 2_565 
O10 H2W O8  0.90 2.14 2.928(11) 145 2 
O11 H3W O4  0.91 2.30 2.973(11) 131 1_565 
O11 H4W O1  0.90 1.84 2.734(15) 171 . 
O12 H5W O11 0.90 2.07 2.941(10) 164 4_546 
O12 H6W O12 0.90 1.97 2.838(7)  160 4_556 
 
_diffrn_measured_fraction_theta_max    0.956 
_diffrn_reflns_theta_full              25.36 
_diffrn_measured_fraction_theta_full   0.956 
_refine_diff_density_max    1.014 
_refine_diff_density_min   -1.230 
_refine_diff_density_rms    0.165 
